# Supplementary material for: Novel Anti-CRR9/CLPTM1L Antibodies with Antitumorigenic Activity Inhibit Cell Surface Accumulation, PI3K Interaction, and Survival Signaling
Source: Oxford University Press journal article supplement (doi:10.1158/1535-7163.mct-15-0717), 2016-03-03
Supplement: 15357163mct150717-sup-152689_2_supp_3355069_m2fv3m.docx [file 15357163mct150717-sup-152689_2_supp_3355069_m2fv3m.docx]

| **Table S2. Selected epitopes for monoclonal antibody development** | | | | |
| --- | --- | --- | --- | --- |
| **Start position** | **End position** | **Sequence** | **Epitope** # | **Antibodies** |
| 78 | 89 | EDFDVESKFERT | 1 | 1-1, 1-2 |
| 112 | 123 | HAGVLPWHDGKQ | 2 | 2-1, 2-2 |
| 186 | 197 | DGSSLPADVHRY | 3 | 3 |
| 195 | 206 | HRYMKMIQLGKT | 4 | 4-1, 4-2 |
| 233 | 244 | TELPLTVSYDKV | 5 | 5-1, 5-2, 5-3 |
